# Supplementary material
Source: MDPI journal article supplement (https://www.mdpi.com/2297-8739/11/5/154)
Supplement: s1 [file s1]

# Supporting Information

---

## **Improving the current European Pharmacopoeia enantioselective HPLC method for the determination of enantiomeric purity in Atorvastatin calcium salt drug substance**

Francesca Romana Mammone, Daniele Sadutto, Giulia D'Ettorre, Antonina Mosca and Roberto Cirilli\*

Centre for the Control and Evaluation of Medicines, Chemical Medicines Unit, Istituto Superiore di Sanita', Viale Regina Elena 299, 00161 Rome, Italy.

\*Corresponding author:

*E-mail address: roberto.cirilli@iss.it*

**Figure S1.** The Chromatogram for the EP test for enantiomeric purity of atorvastatin calcium: a 7% atorvastatin calcium, 0.3% impurity E and 0.15% impurity H solution.

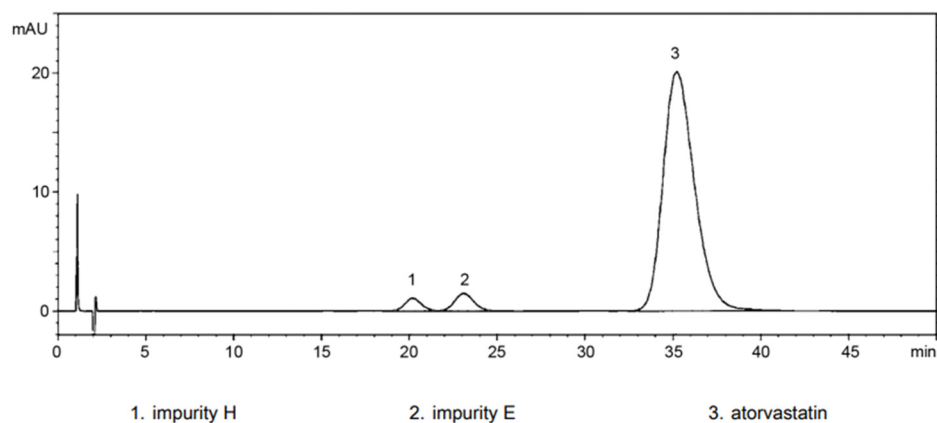

\*The Chromatogram and information were obtained from European Pharmacopoeia.

**Figure S2.** Atorvastatin for peak identification B CRS.

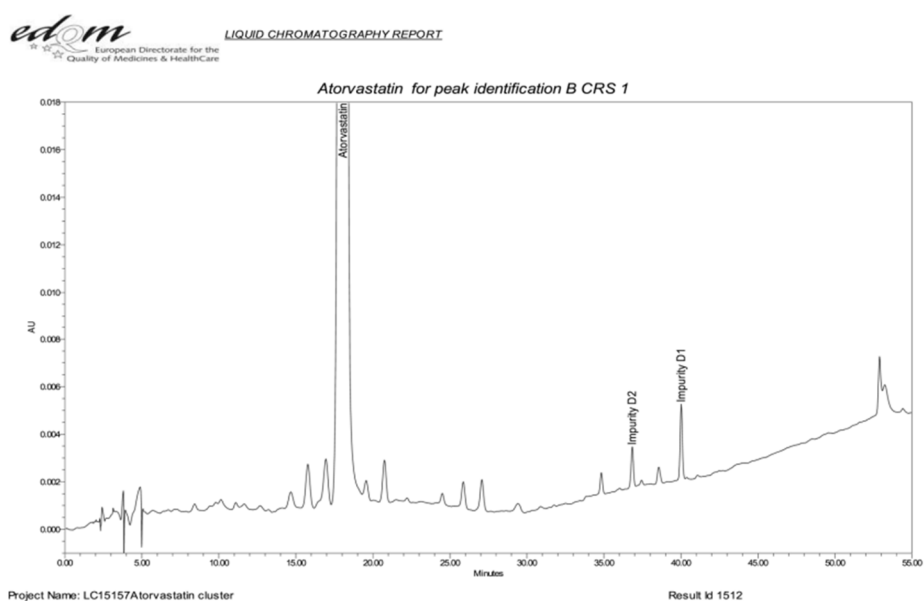

\*The Chromatogram was obtained from European Pharmacopoeia.
